# Supplementary figures and images for: Complete Genome Sequencing, Molecular Epidemiological, and Pathogenicity Analysis of Pigeon Paramyxoviruses Type 1 Isolated in Guangxi, China during 2012–2018
Source: MDPI journal article supplement (doi:10.3390/v12040366), 2020-03-26

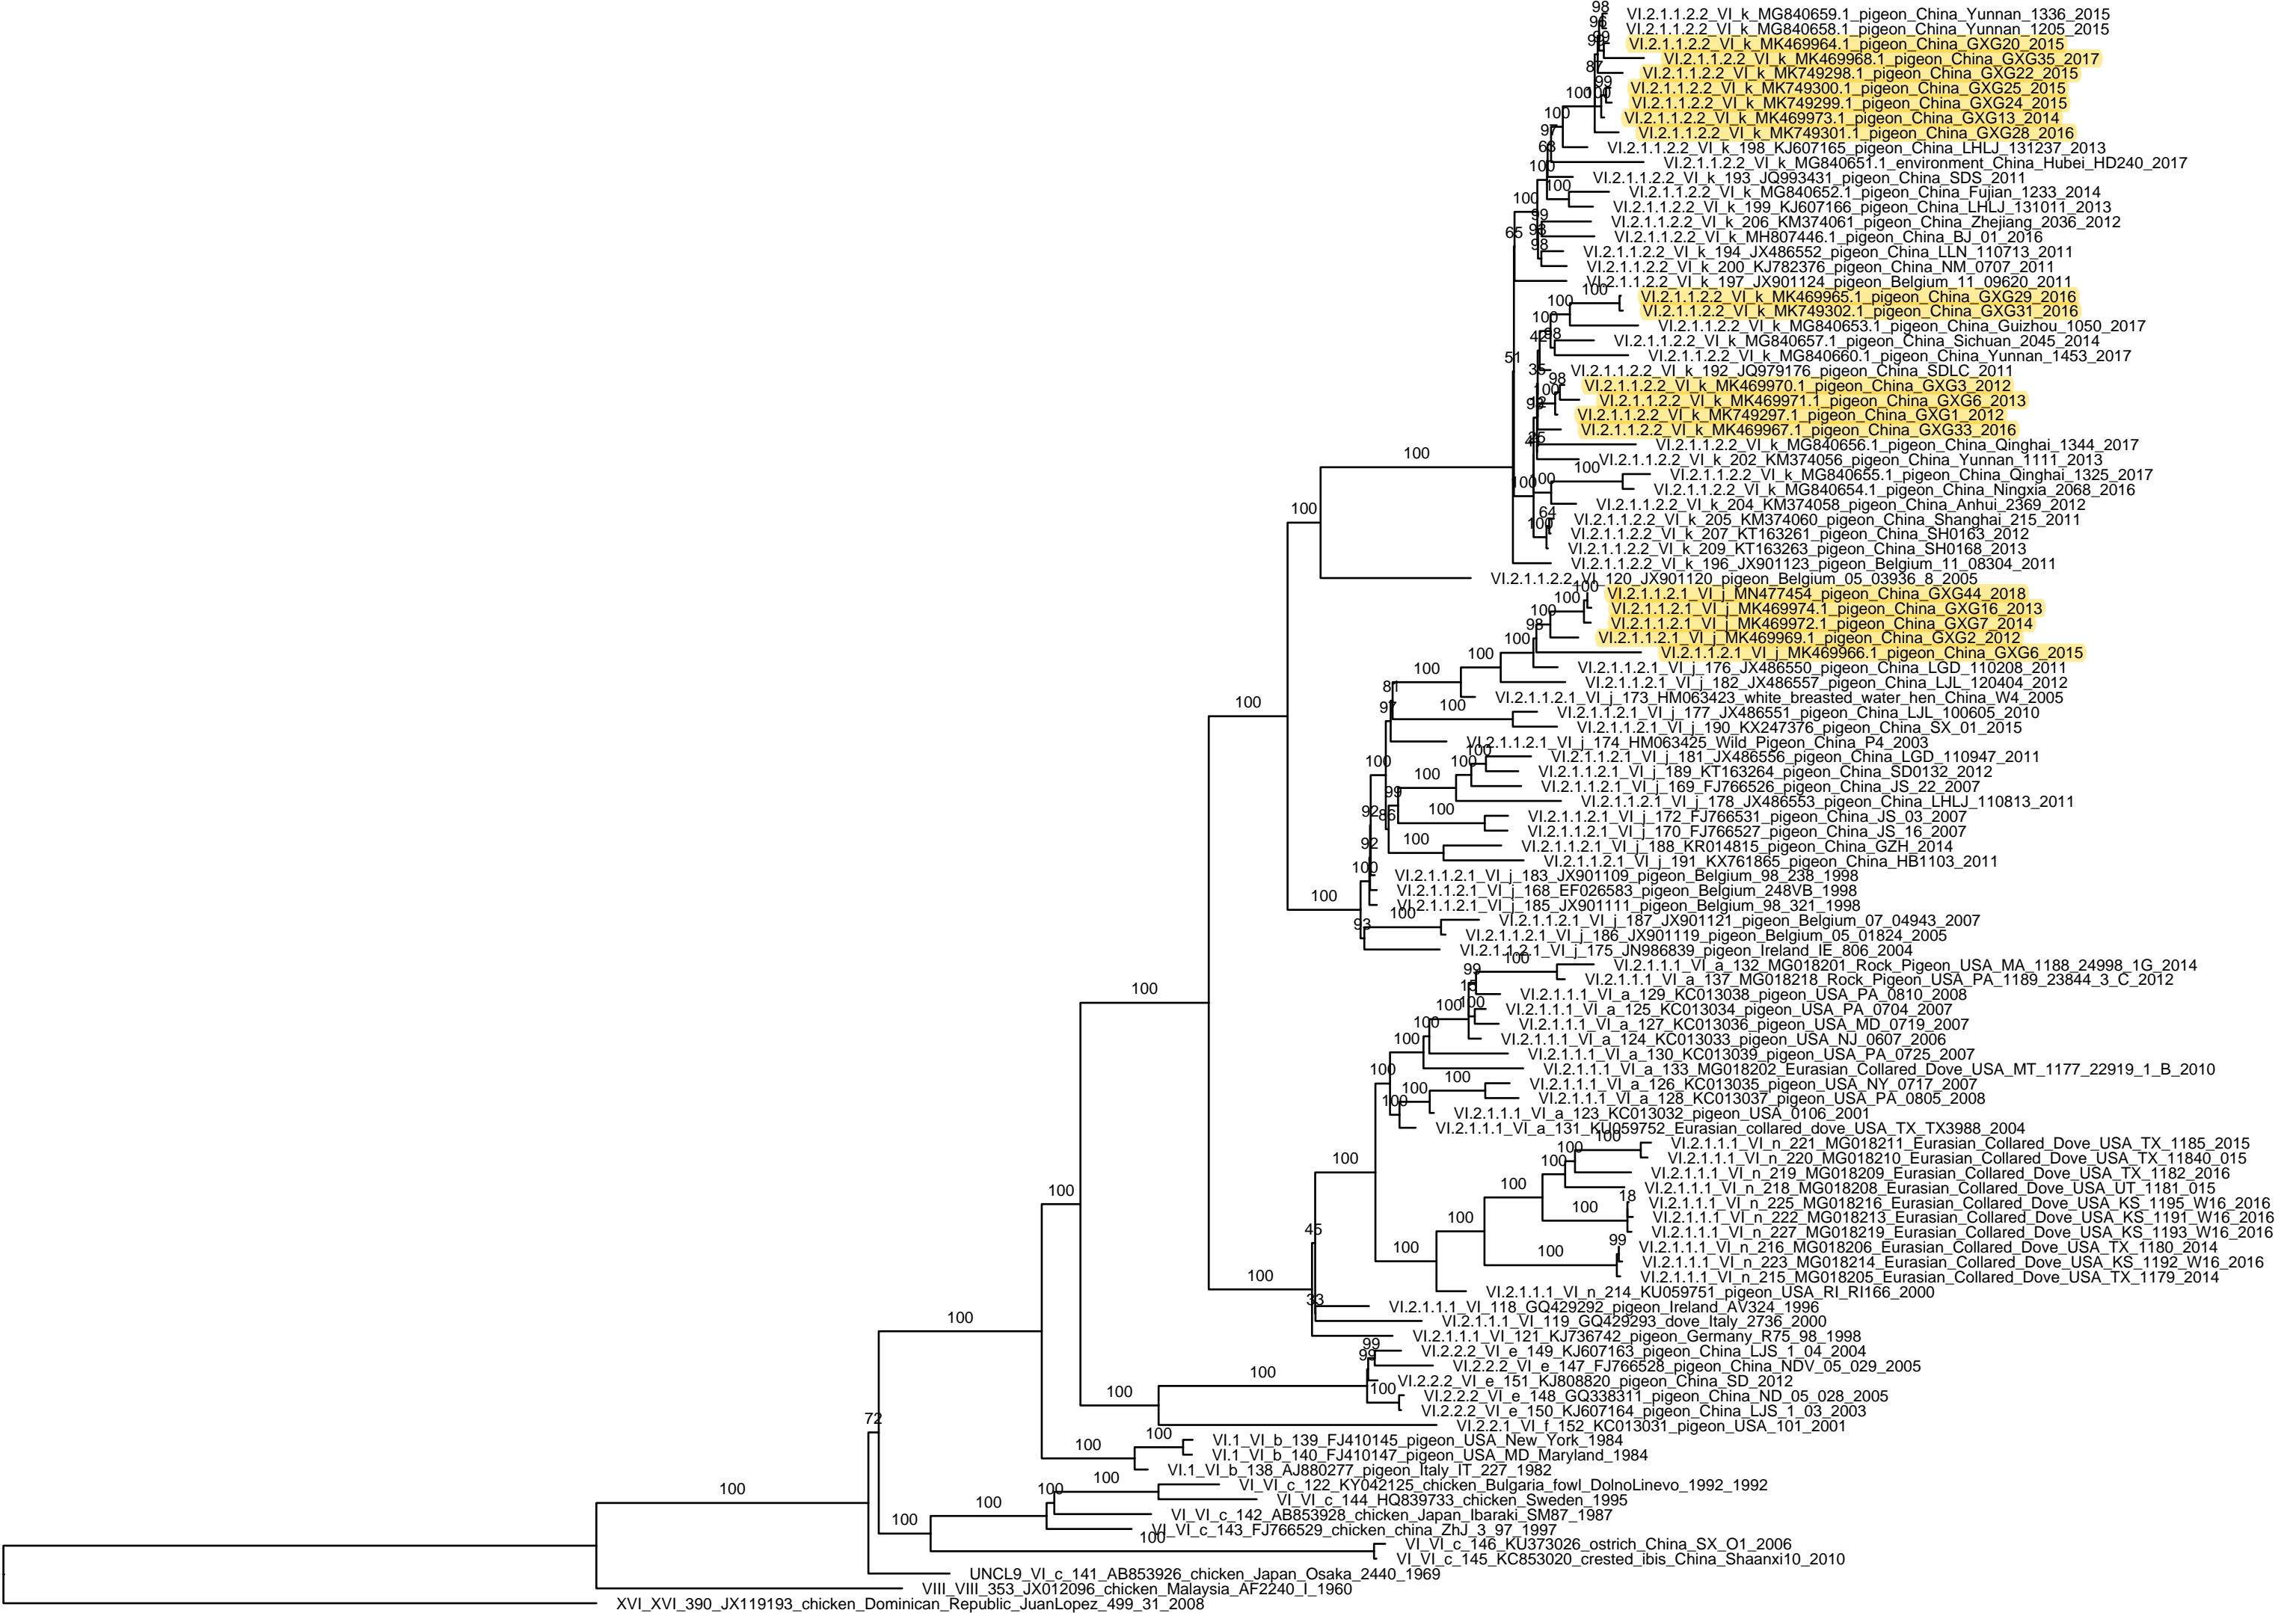

0.02

Supplement: s1 [file s1]
